# Supplementary material for: Enzymes involved in the anaerobic degradation of phenol by the sulfate-reducing bacterium Desulfatiglans anilini
Source: PubMed Central journal article supplement (PMC6114531; doi:10.1186/s12866-018-1238-0), 2018-08-29

Marker *ppsα* *ppsβ* *ppsγ* *ppcα* *ppcβ* *ppcδ* *AsrA*

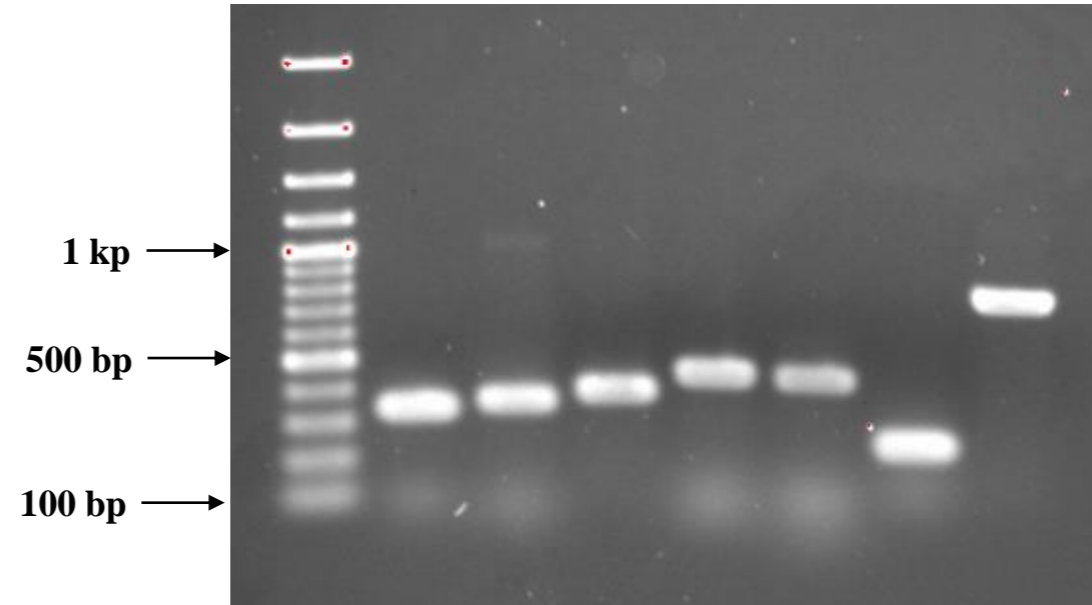

Supplement: 12866_2018_1238_MOESM1_ESM.pdf [file 12866_2018_1238_MOESM1_ESM.pdf]
